# Supplementary material for: Spatiotemporal tracking of gold nanorods after intranasal administration for brain targeting
Source: PubMed Central journal article supplement (PMC10390340; doi:10.1016/j.jconrel.2023.04.022), 2023-05
Supplement: mmc1.pdf [file mmc1.pdf]

# Supplementary Information

## Spatiotemporal tracking of gold nanorods after intranasal administration for brain targeting

Shunping Han<sup>1,6</sup>, Julie Tzu-Wen Wang<sup>1</sup>, Emine Yavuz<sup>1,5</sup>, Alaa Zam<sup>1</sup>, Nadia Rouatbi<sup>1</sup>, Rifka Nurul Utami<sup>1</sup>, Revadee Liam-Or<sup>1</sup>, Alexander Griffiths<sup>2</sup>, Wayne Dickson<sup>3,6</sup>, Jane Sosabowski<sup>4</sup> and Khuloud T. Al-Jamal<sup>1,6\*</sup>

1. Institute of Pharmaceutical Science, Faculty of Life Sciences & Medicine, King's College London, Franklin-Wilkins Building, 150 Stamford Street, London SE1 9NH, United Kingdom
2. London Metallomics Facility, King's College London, Franklin-Wilkins Building, 150 Stamford Street, London SE1 9NH, United Kingdom
3. Department of Physics, King's College London, Strand, London WC2R 2LS, United Kingdom
4. Centre for Molecular Oncology, Barts Cancer Institute, Queen Mary University of London, Charterhouse Square, London EC1M 6BQ, United Kingdom
5. Advanced Technology Research and Application Center, Selcuk University, Aleaddin Keykubat Yerleskesi, Akademi Mah. Yeni Istanbul Cad. No: 355/C, Selcuklu, Konya, Turkey
6. London Centre for Nanotechnology, King's College London, Strand, London WC2R 2LS, United Kingdom

\*Corresponding author: Khuloud T. Al-Jamal  
E-mail address: khuloud.al-jamal@kcl.ac.uk

Keywords: Gold nanorods, intranasal administration, biodistribution, brain region-specific uptake, multi-modal imaging, glioma

## 34 **Supplementary methods**

### 35 **Amine group detection by Ninhydrin assay.**

36 Ninhydrin assay was used to detect the primary amine group in NH<sub>2</sub>-PEG-SH. In brief, 100 μL of sample  
37 was mixed with 100 μL of Ninhydrin reagent (2% solution). The mixture was heated at 95 °C for 8 min  
38 in a water bath. After cooling down to room temperature, the mixture was diluted 20-fold with  
39 ethanol and the absorbance was read at 570 nm by a plate reader (BMG Labtech, USA). The standard  
40 curves of NH<sub>2</sub>-PEG-SH was established in the concentrations between 0 – 1.5 mM using deionized  
41 water as solvent or 0 - 5 mM using DMSO as solvent for calculation.

### 42 **PEG detection by iodine solution-based assay**

43 The concentration of PEG was determined using iodine solution-based assay by the published method  
44 with modifications [1]. Iodine solution was prepared by dissolving 1.27 g iodine in 100 mL of 2% (w/v)  
45 potassium iodide. Samples were diluted with deionized water to final concentrations of PEG within  
46 the range of 0 - 20 μM. To an 800 μL of sample, 20 μL of iodine solution was added. The blank was  
47 prepared as above with deionized water instead of the sample. Solutions were agitated to ensure  
48 adequate mixing and then read at 535 nm by the plate reader. The standard curves of NH<sub>2</sub>-PEG-SH  
49 with the concentrations between 0 - 20 μM was established and measured in the same condition for  
50 calculation.

### 51 **DTPA detection by Gd<sup>3+</sup>-Xylenol Orange assay**

52 DTPA was detected using indirect Xylenol Orange assay by the method published previously with  
53 modifications [2]. Xylenol Orange tetrasodium salt (3 mg) was dissolved in acetic buffer (10 mL, pH  
54 5.8) to obtain Xylenol Orange solution. The Xylenol Orange solution was prepared freshly before use.  
55 In brief, the synthesized DTPA-PEG-SH (100 μL) was mixed with excess GdCl<sub>3</sub> (100 μL) with known  
56 concentration and vortexed for 30 s. Afterwards, the above mixture (50 μL) was added with Xylenol  
57 Orange solution (500 μL). The free Gd<sup>3+</sup> can coordinate with Xylenol Orange and develop violet color  
58 in acid condition. The concentration of free Gd<sup>3+</sup> in the above mixture was measured by the plate  
59 reader which is proportional to the ratio of the absorbances at 573 and 433 nm. The standard curve  
60 of Gd<sup>3+</sup> was established in the concentrations of 0 - 1 mM. DTPA concentration in the mixture was  
61 calculated by subtracting the free Gd<sup>3+</sup> from the initial one.

62

63

64

65

66

## **Supplementary results**

67

68

69

70

71

72

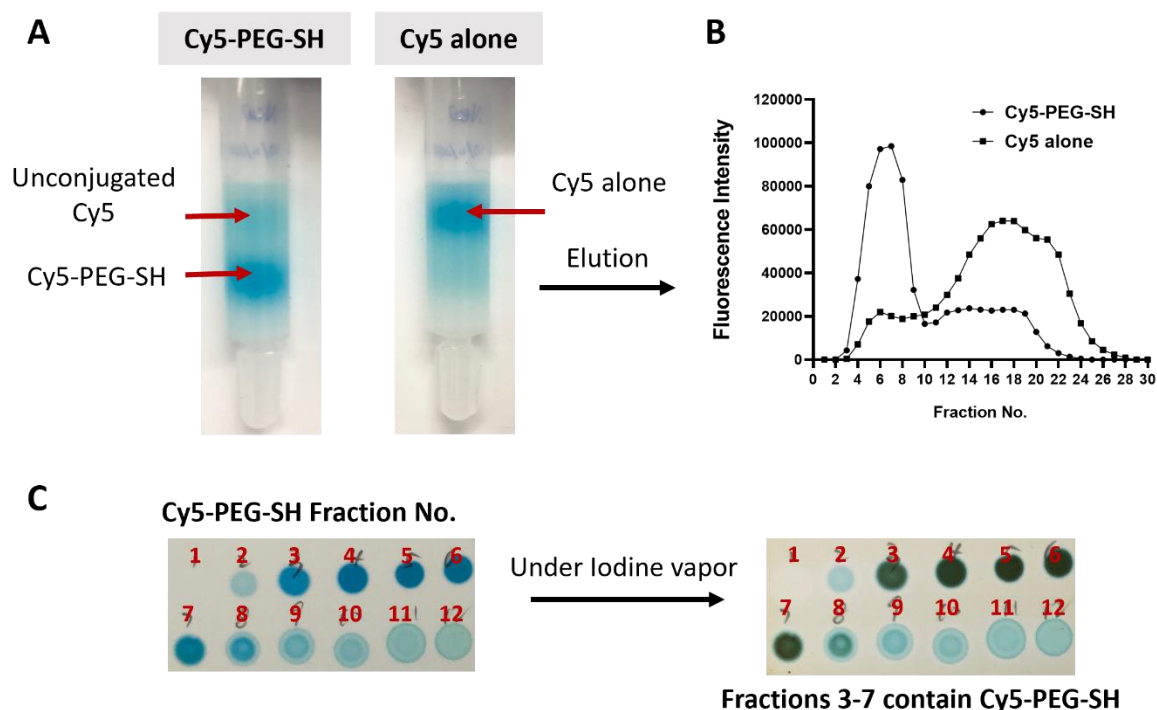

73

74 **Figure S1. Confirmation of Cy5-PEG-SH linker synthesis.** (A) After synthesis, Cy5-PEG-SH (500  $\mu$ L) was added to  
 75 a NAP<sup>TM</sup>-5 column and entered the gel bed completely. Cy5 alone was applied as a control. (B) Samples were  
 76 eluted by deionized water. Each fraction containing 120  $\mu$ L of elution was collected and diluted 100-fold for  
 77 fluorescence intensity measurement. Cy5-PEG-SH conjugates were eluted first followed by the unreacted sulfo-  
 78 cyanine5 NHS ester. (C) A representative image of different Cy5-PEG-SH fractions on TLC plate. Only fractions  
 79 which were both Cy5 and PEG fragment positive were collected.

80

81 **Table S1. Optimization of NH<sub>2</sub>-PEG-SH and DTPA anhydride conjugation.**

| NH <sub>2</sub> -PEG-SH starting concentration (mM) <sup>[1]</sup> | DTPA anhydride starting concentration (mM) <sup>[1]</sup> | Molar ratio (PEG: DTPA anhydride) | Reaction time (h) | PEG substitution (%) <sup>[2-3]</sup> |
|--------------------------------------------------------------------|-----------------------------------------------------------|-----------------------------------|-------------------|---------------------------------------|
| 2.5                                                                | 5                                                         | 1:2                               | 4                 | 81.2 $\pm$ 12.0                       |
|                                                                    | 2.5                                                       | 1:1                               |                   | 75.4 $\pm$ 18.6                       |
|                                                                    | 1.25                                                      | 2:1                               |                   | 48.9 $\pm$ 3.3                        |
|                                                                    | 0.625                                                     | 4:1                               |                   | 20.8 $\pm$ 1.4                        |
|                                                                    | 5                                                         | 1:2                               | 24                | 76.4 $\pm$ 18.3                       |
|                                                                    | 2.5                                                       | 1:1                               |                   | 82.5 $\pm$ 13.8                       |
|                                                                    | 1.25                                                      | 2:1                               |                   | 51.5 $\pm$ 1.3                        |
|                                                                    | 0.625                                                     | 4:1                               |                   | 43.8 $\pm$ 2.7                        |

82

[1] Reaction volume is 0.5 mL using DMSO as the solvent.

[2] The substitution of amine groups in NH<sub>2</sub>-PEG-SH was determined by Ninhydrin assay.

[3] PEG substitution is calculated by the following equation:

$$\text{PEG substitution (\%)} = \frac{\text{Initial amine group concentration (mM)} - \text{amine group concentration after reaction (mM)}}{\text{Initial amine group concentration (mM)}}$$

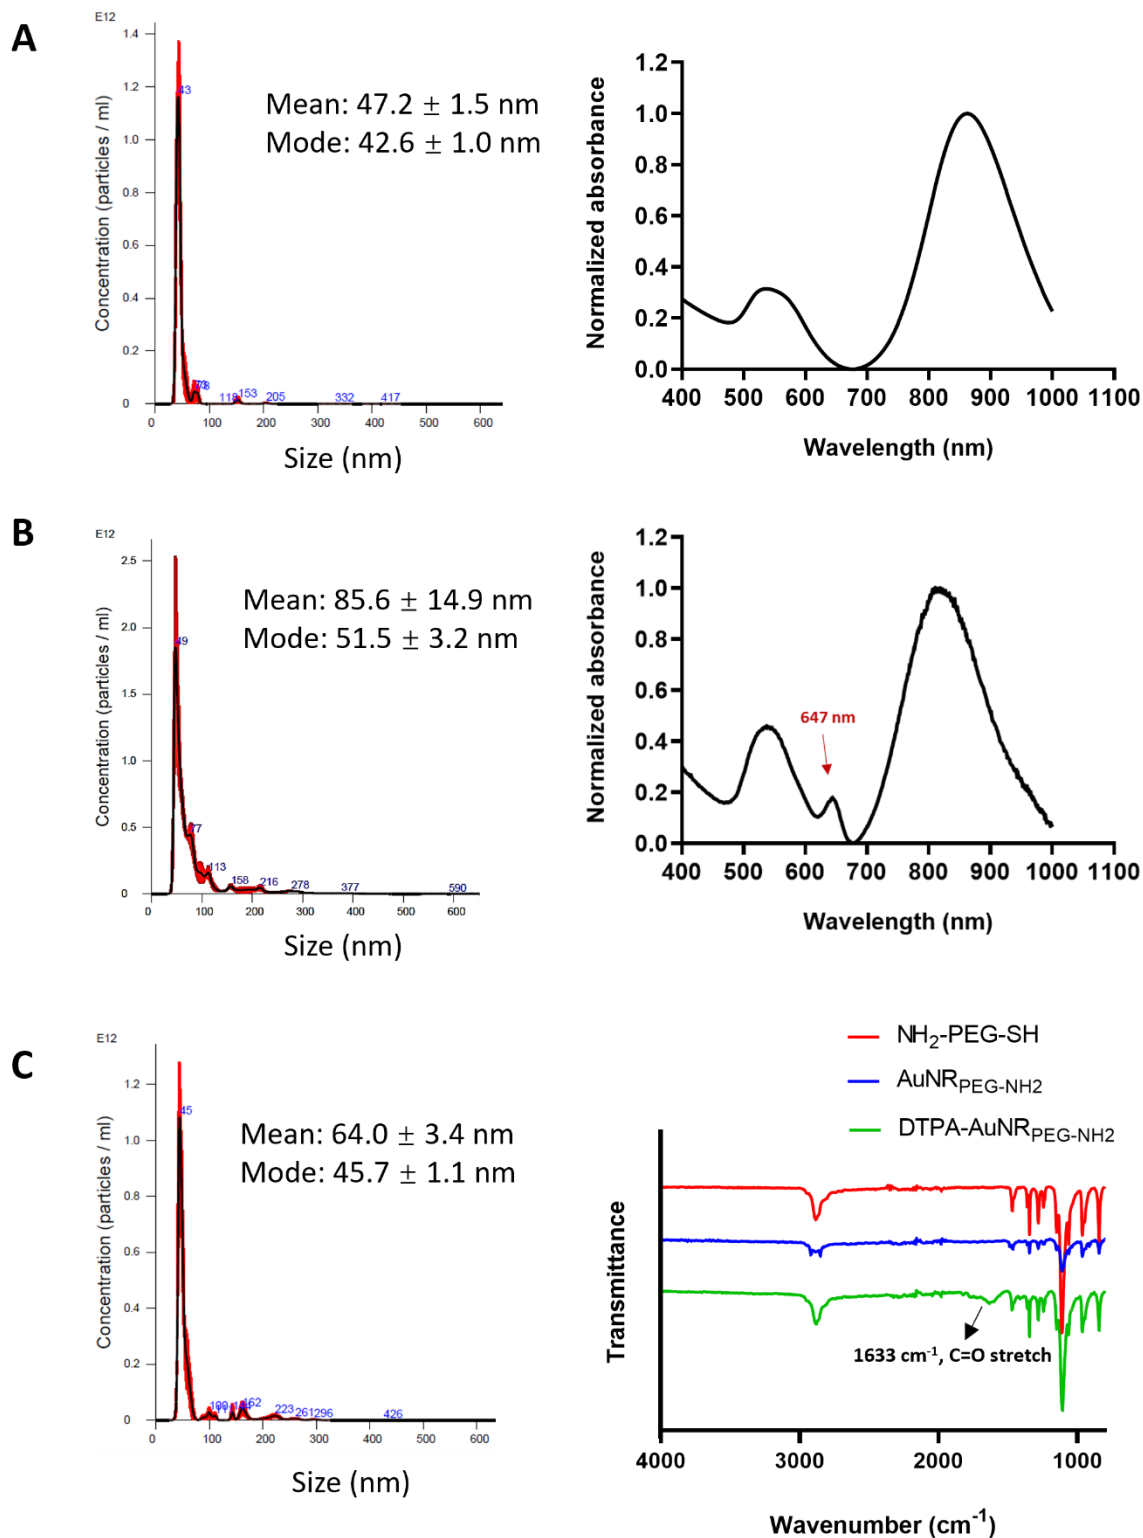

83

84 **Figure S2. Characterization of  $\text{AuNR}_{\text{PEG-NH}_2}$ ,  $\text{Cy5-AuNR}_{\text{PEG-NH}_2}$  and  $\text{DTPA-AuNR}_{\text{PEG-NH}_2}$ .** (A) Representative  
 85 hydrodynamic size distribution and UV-vis-NIR spectrum of  $\text{AuNR}_{\text{PEG-NH}_2}$ . (B) Representative hydrodynamic size  
 86 distribution and UV-vis-NIR spectrum of  $\text{Cy5-AuNR}_{\text{PEG-NH}_2}$ . The conjugated  $\text{Cy5-AuNR}_{\text{PEG-NH}_2}$  demonstrated a  
 87 typical peak which is consistent with the excitation wavelength of Cy5. (C) Representative hydrodynamic size  
 88 distribution and FT-IR spectra of  $\text{DTPA-AuNR}_{\text{PEG-NH}_2}$ . The typical PEG bonds and the amide bond at  $1633 \text{ cm}^{-1}$  in  
 89  $\text{DTPA-AuNR}_{\text{PEG-NH}_2}$  confirmed the successful DTPA-PEG-SH conjugation to AuNRs.

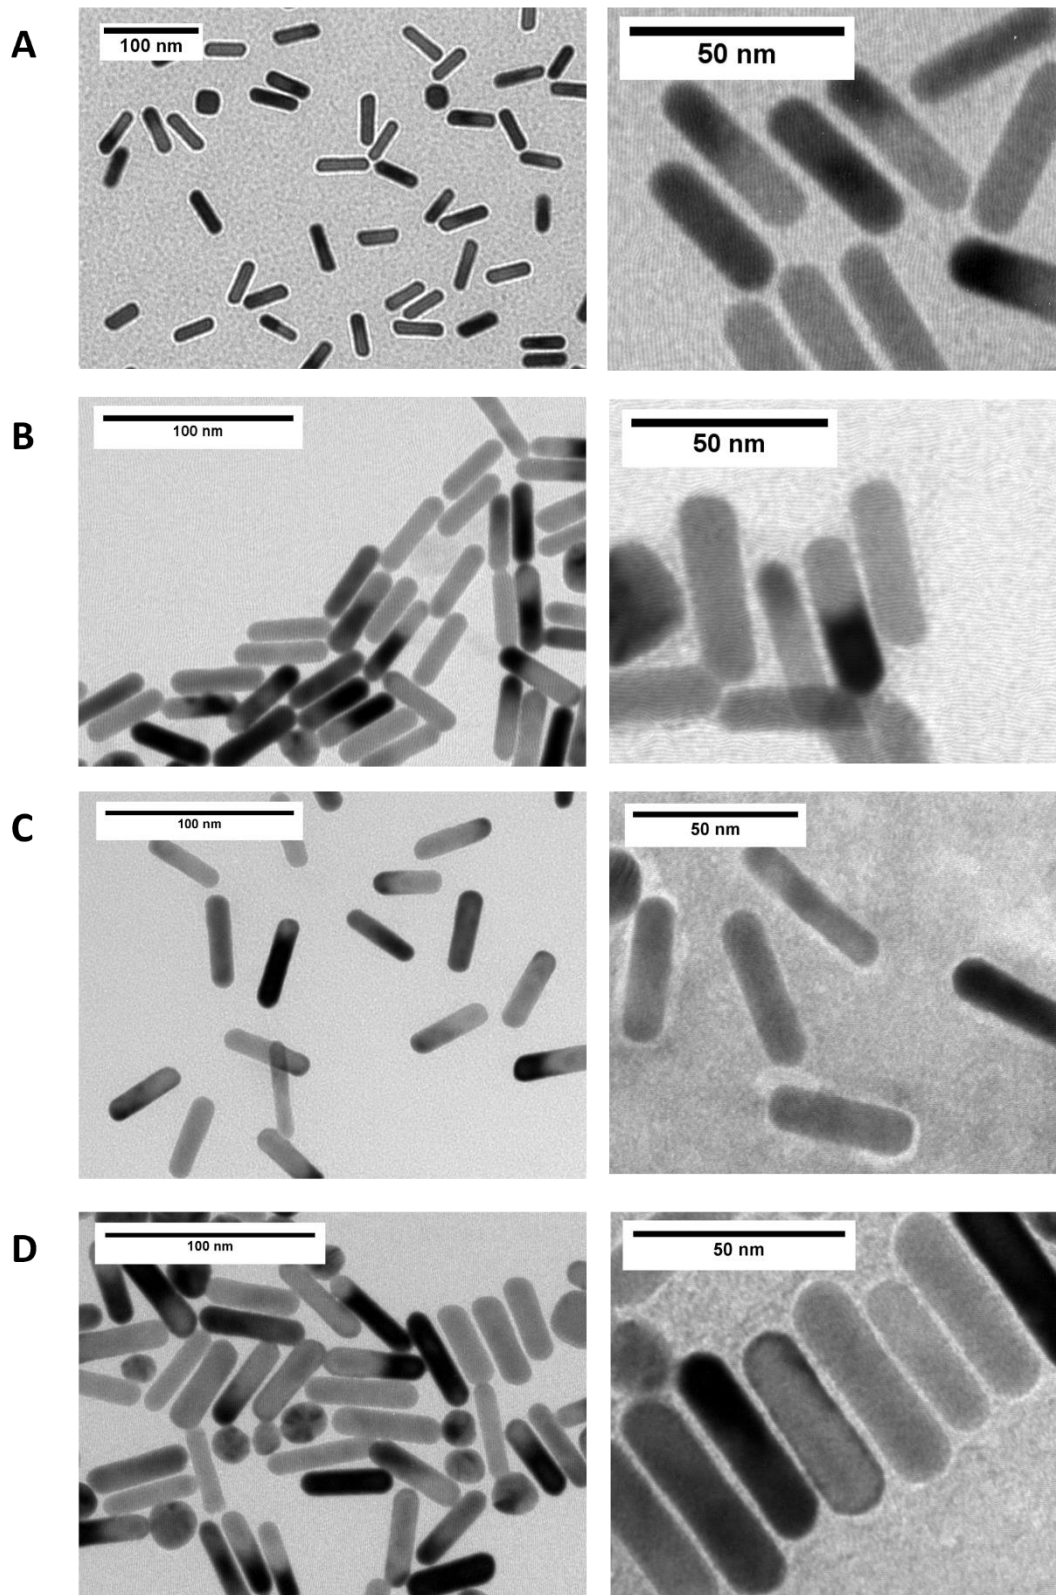

90  
91  
92  
93  
94  
95

**Figure S3. TEM images of (A) AuNR<sub>CTAB</sub>, (B) AuNR<sub>PEG-NH<sub>2</sub></sub>, (C) Cy5-AuNR<sub>PEG-NH<sub>2</sub></sub>, and (D) DTPA-AuNR<sub>PEG-NH<sub>2</sub></sub> without (left) and with (right) uranyl acetate staining. For staining, samples were treated with 3% uranyl acetate for 2-3 min and then washed 2 times with filtered deionized water.**

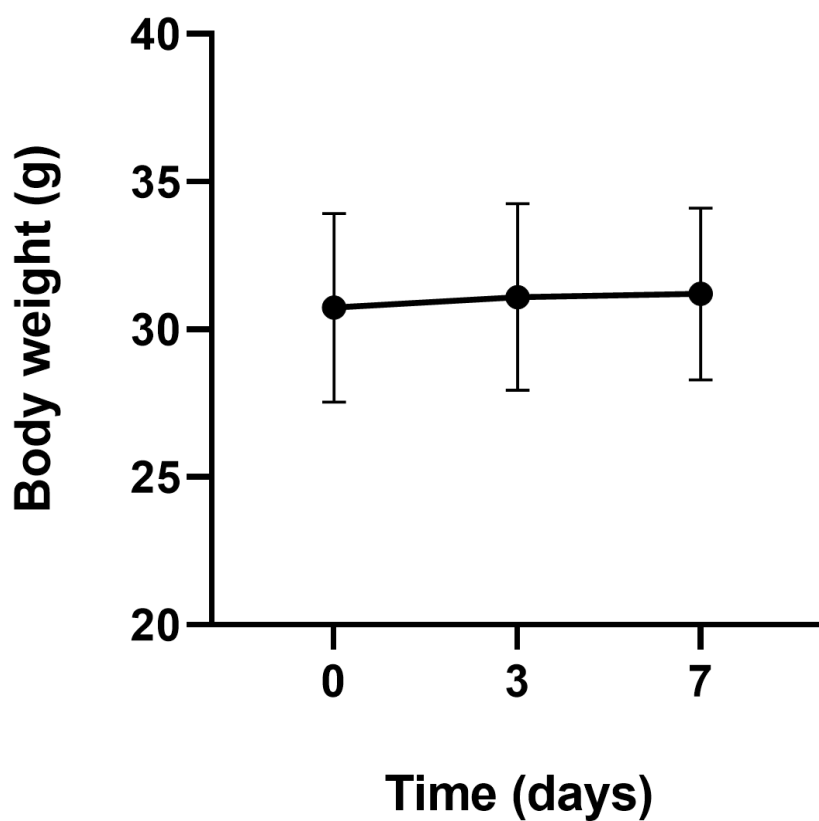

96  
97 **Figure S4. Whole body weight variation of CD-1 mice after intranasal administration of Cy5-AuNR<sub>PEG-NH<sub>2</sub></sub> (20**  
98 **μL, 300 nM of particles).** Data are expressed as mean ± SD, n=3. There are no significant differences between  
99 different days,  $P > 0.05$ .  
100

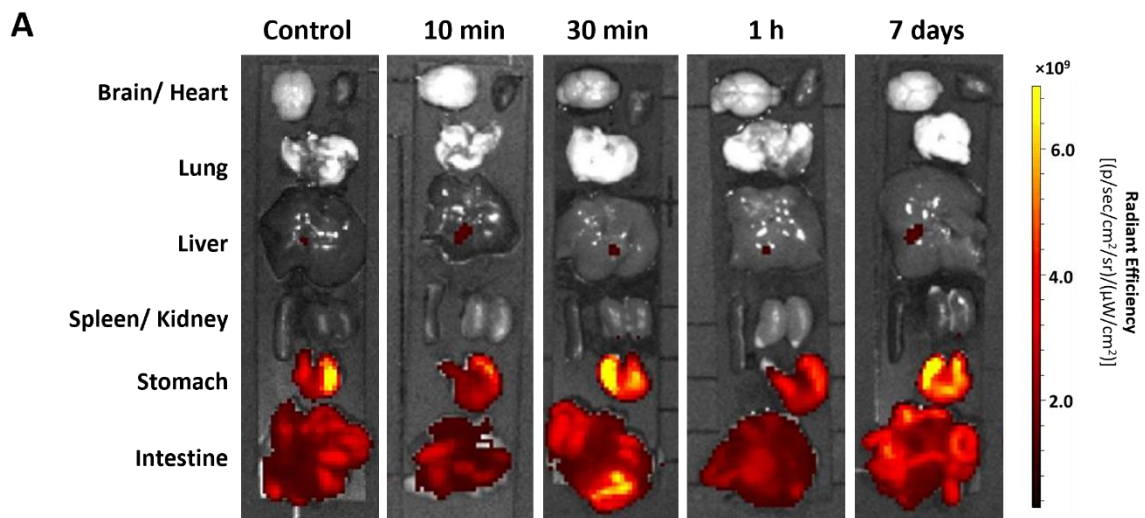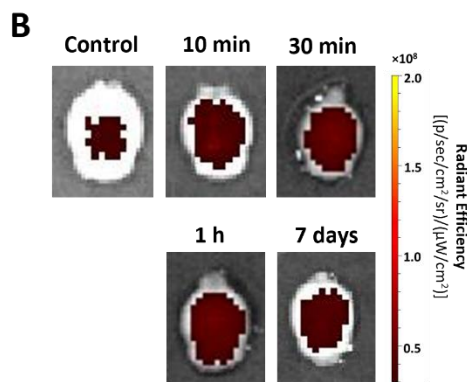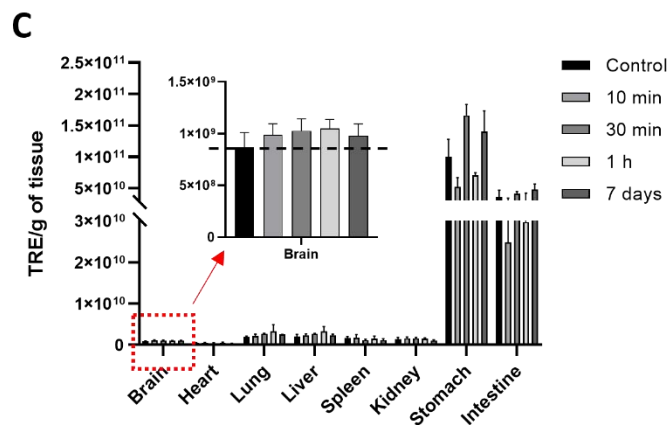

103 **Figure S5. Ex vivo imaging of Cyanine5 in CD-1 mice after intranasal administration.** Cyanine5 (20  $\mu$ L) at  
 104 equivalent fluorescence intensity to the formulations was intranasally administered into CD-1 mice.  
 105 Representative *ex vivo* images of excised (A) organs and (B) brains harvested at 10 min, 30 min, 1 h and 7 days  
 106 post-administration. Mice without any treatment were used as the control group. (C) *Ex vivo* quantification of  
 107 fluorescence signals of Cyanine5 per gram of tissue at different time points. Values were expressed as mean  $\pm$   
 108 SD, n=3. There are no significant differences in the brain fluorescence intensity between each group ( $P > 0.05$ ).  
 109 All images were obtained by IVIS Lumina<sup>®</sup> III and data were analysed by Living Image software.



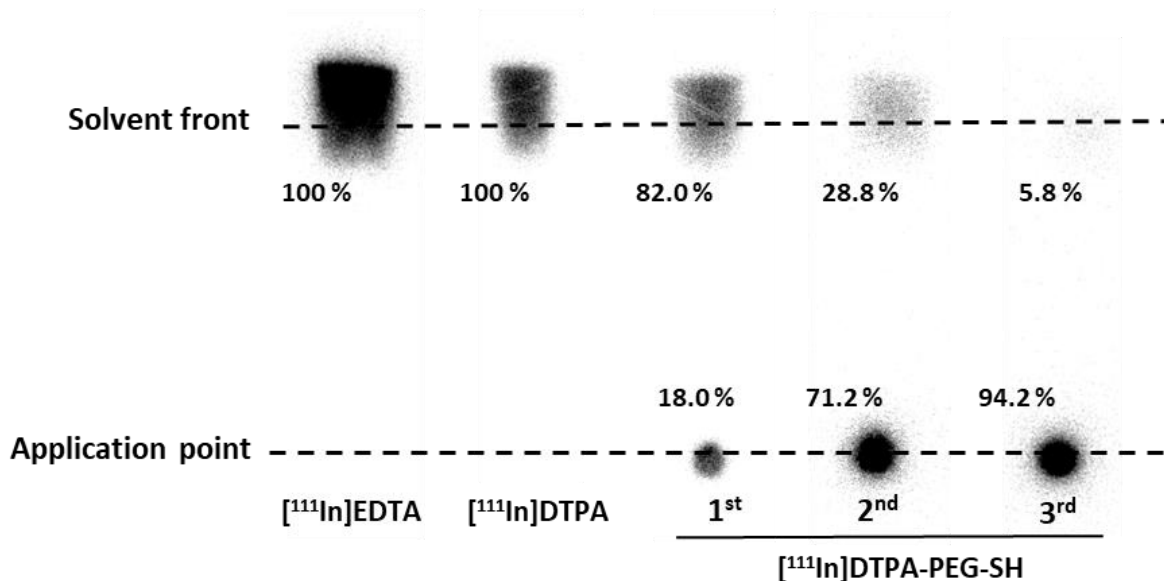

110

111

112 **Figure S6. The Indium-111 complexation efficiency of DTPA-PEG-SH after running with PD-10 column with**  
 113 **different times.** The iTLC paper was run on 0.1 M ammonium acetate with 0.25 mM EDTA (pH 5.5) as the mobile  
 114 phase and imaged using a phosphorimager. After running by PD-10 column with 3 rounds, the Indium-111  
 115 complexation efficiency was higher than 90%.

116

117

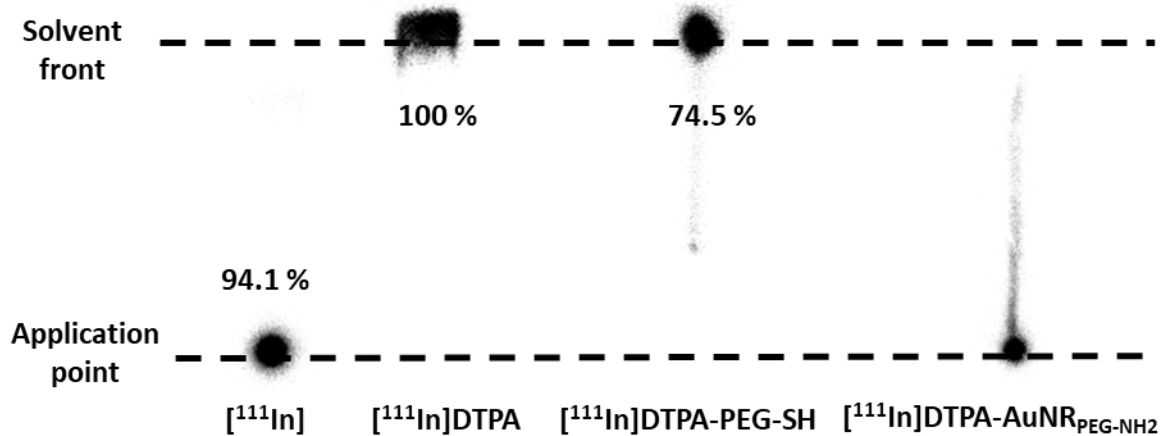

118

119 **Figure S7. Contamination test of DTPA and DTPA-PEG-SH in DTPA-AuNR<sub>PEG-NH<sub>2</sub></sub>.** The iTLC paper was run on 3.5%  
 120 ammonia: methanol (1:1, v/v, pH 10.5) as the mobile phase and imaged using a phosphorimager. [<sup>111</sup>In]DTPA  
 121 and [<sup>111</sup>In]DTPA-PEG-SH appeared as mobile spots at the solvent front. [<sup>111</sup>In]DTPA-AuNR<sub>PEG-NH<sub>2</sub></sub> demonstrated a  
 122 migration from the application point without presenting significant radioactivity in the solvent front, confirming  
 123 the high purity of [<sup>111</sup>In]DTPA-AuNR<sub>PEG-NH<sub>2</sub></sub>.

124

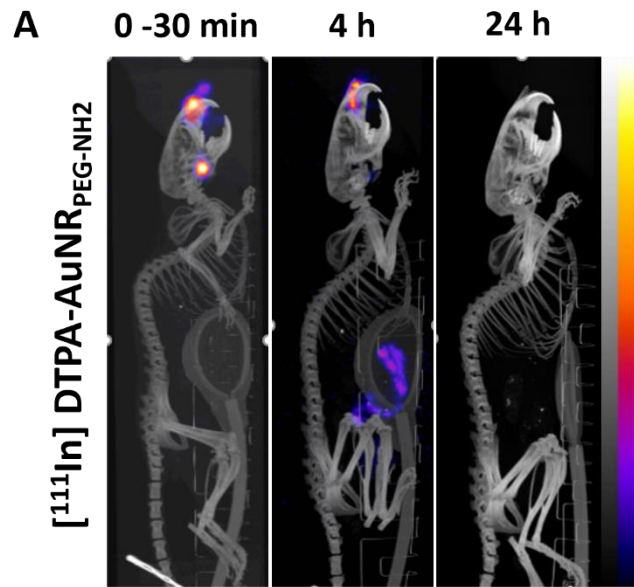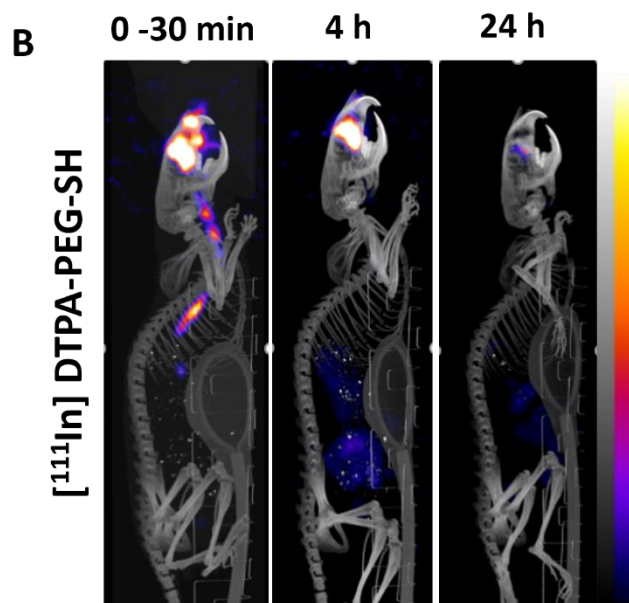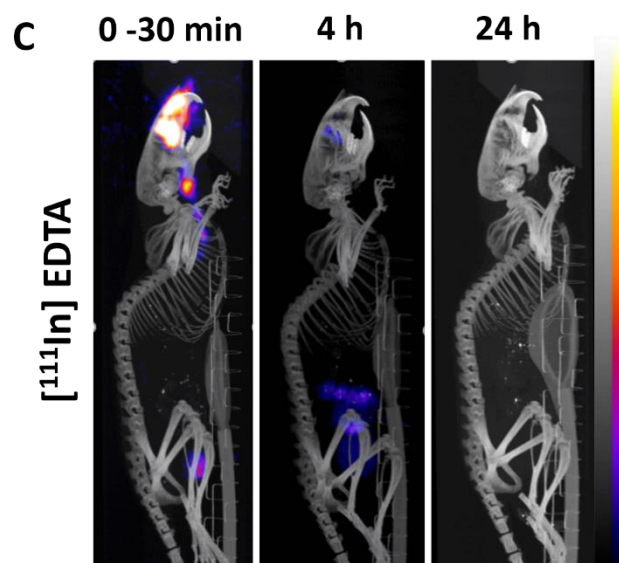

126 **Figure S8. Whole body SPECT/CT imaging of [<sup>111</sup>In]-labelled (A) DTPA-AuNR<sub>PEG-NH<sub>2</sub></sub>, (B) DTPA-PEG-SH and (C)**  
 127 **EDTA in CD-1 mice.** CD-1 mice were intranasally administered with 5-10 MBq of [<sup>111</sup>In]-labelled compounds.  
 128 Imaging was done at 0-30 min, 4 h and 24 h post-administration.  
 129

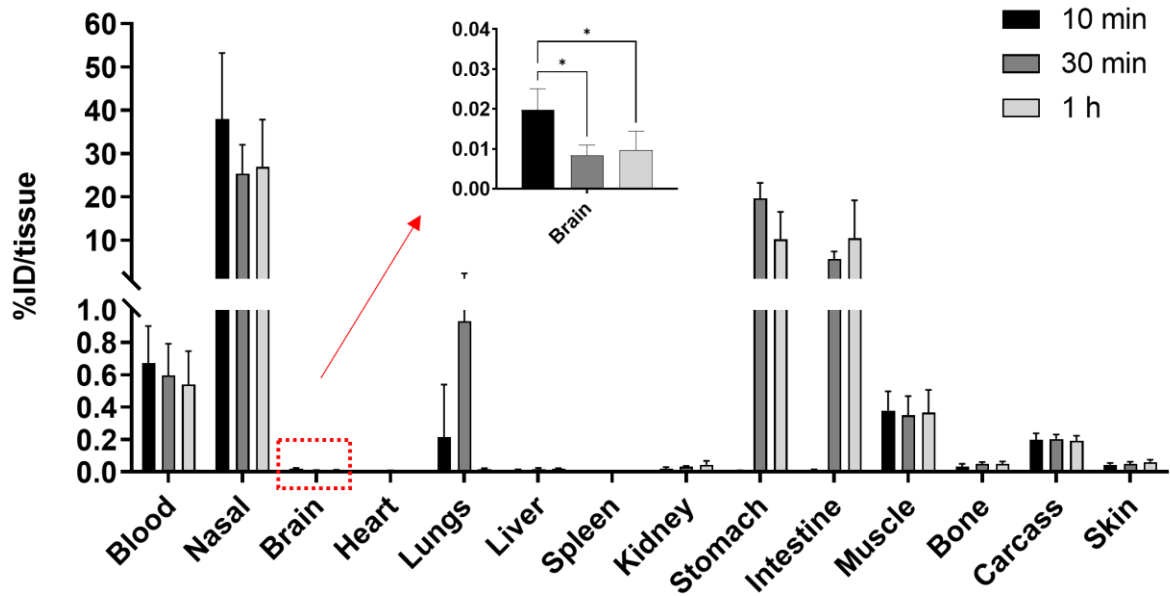

130  
 131 **Figure S9. Organ biodistribution of [<sup>111</sup>In]DTPA-AuNR<sub>PEG-NH<sub>2</sub></sub>.** Animals were culled at 10 min, 30 min or 1 h  
 132 post-administration. Inset shows the zoomed-in %ID per brain uptake.  
 133

134

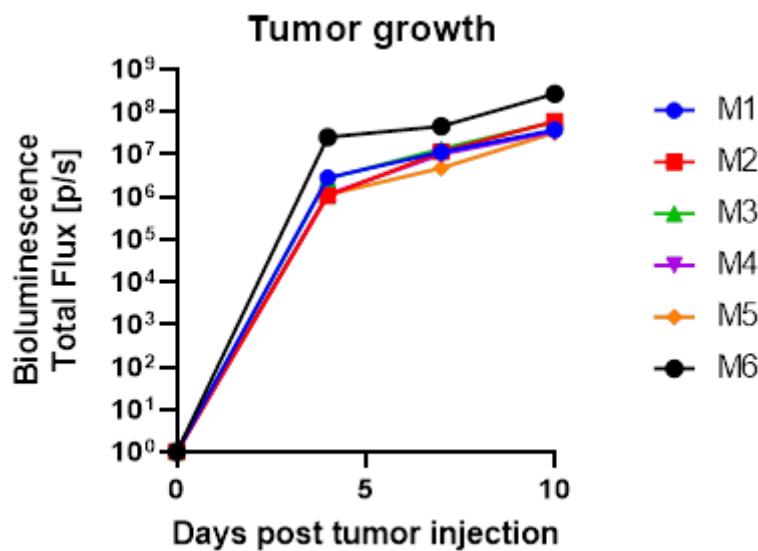

135  
 136 **Figure S10. Tumor growth curves after GL261 cells injection.** Murine GL261 cells (200 K, 2 μL) expressing Red-  
 137 Fluc luciferase, were stereotactically inoculated into the left hemisphere of 4-6 weeks old C57BL/6 mice. Tumor

138 growth was monitored by whole-body Bioluminescence Imaging. Tumor growth was plotted as Bioluminescence  
139 intensity, expressed as photons/second (p/s) over time.

140

#### 141 **Reference**

- 142 1. Gong, X.W., et al., *Discarded free PEG-based assay for obtaining the modification extent of*  
143 *pegylated proteins*. *Talanta*, 2007. **71**(1): p. 381-4.
- 144 2. Barge, A., et al., *How to determine free Gd and free ligand in solution of Gd chelates. A*  
145 *technical note*. *Contrast media & molecular imaging*, 2006. **1**(5): p. 184-188.

146
